# Supplementary material
Source: MDPI journal article supplement (https://www.mdpi.com/2073-4344/13/1/190)
Supplement: s1 [file s1]

## Supplementary Materials

### 1. Materials.

Isopropyl alcohol (99.7%), glycerol (99%), iron (III) nitrate nonahydrate (98.5%), Nickel chloride hexahydrate ( $\text{NiCl}_2 \cdot 6\text{H}_2\text{O}$ ) (98%), 4-nitrophenol (99%), methylene orange (MO), Congo red (CR) sodium borohydride (96%) were purchased from Sinopharm Chemical Reagent Co., Ltd. (Shanghai, China). Potassium tetrachloropalladate ( $\text{K}_2\text{PdCl}_4$ ) was procured from Aladdin Chemistry Co., Ltd. (China). Deionized water (resistivity  $> 18 \Omega \cdot \text{cm}^{-1}$ ) was used for all synthesis and experiments.

### 2. Characterization

The morphology and structure of the products were characterized by scanning electron microscopy (SEM, VEGA 3, Tescan) and transmission electron microscopy (STEM) Aberration-corrected scanning transmission electron microscopy (AC-STEM) images were acquired by using FEI Titan 80-300 equipped with a probe spherical aberration corrector and a monochromator at 300 kV. HAADF-STEM images were acquired with the illumination semi-angle of 25 mrad and probe current of 100 pA. The collection angles for the HAADF-STEM images were 120–250 mrad. The dwell time for image acquisition was set at 10  $\mu\text{s}$  per pixel to ensure a desirable signal to noise ratio. The metal content of the prepared catalysts was determined with an inductivity coupled plasma-mass spectrometer (ICP-MS, Agilent 7700X, USA). The powder X-ray diffraction (XRD) patterns were recorded on a Cu ( $K\alpha$ ) X-ray diffractometer ( $\lambda = 1.5406 \text{ \AA}$ ) (Philips PW-1830, Netherlands), in which the step size and scan rate were set as  $5^\circ/\text{min}$ , respectively. The X-ray photoelectron spectrum (XPS) was tested on an ESCALAB MKII spectrometer (VG Co., UK), using Mg  $K\alpha$  radiation (1253.6 eV) at a pressure of  $2.0 \times 10^{-10}$  mbar. The specific surface area was measured with Micromeritics ASAP2020. The SSA and porous size were calculated according to the Brunauer-Emmett-Teller (BET) and Barrett-Joyner-Halenda (BJH) methods, respectively. The UV-Vis spectra were measured with a UV-vis spectrophotometer (UV-2550, Shimadzu, Japan).

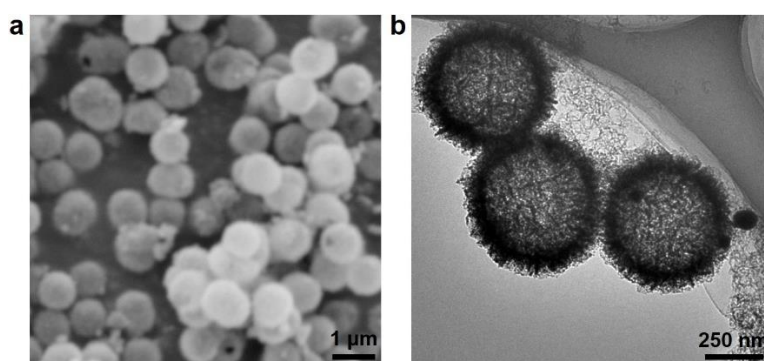

**Figure S1** (a) SEM image and (b) TEM image of pristine  $\text{Fe}_3\text{O}_4$  nanospheres.

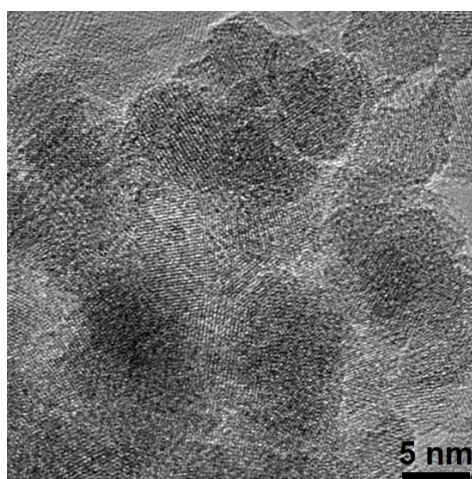

**Figure S2** High-resolution TEM image of Ni-Pd/Fe<sub>3</sub>O<sub>4</sub> catalyst.

### 3. Reduction reaction equations

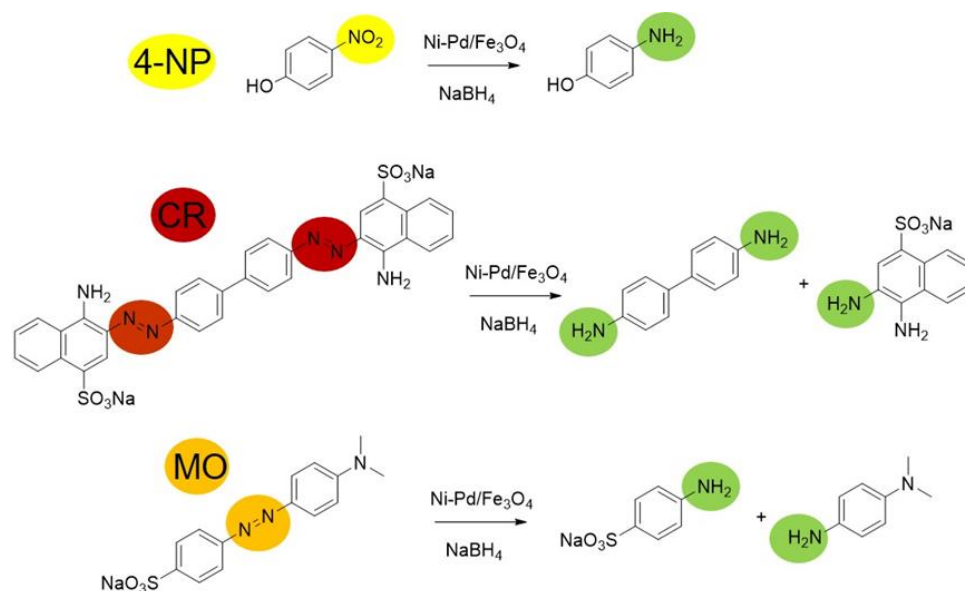

**Figure S3.** Catalytic reduction reaction equations of 4-NP, CR, and MO by NaBH<sub>4</sub> in the presence of Pd/Fe<sub>3</sub>O<sub>4</sub> catalyst.

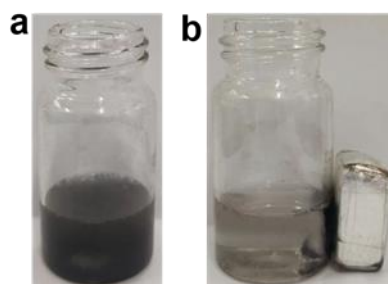

**Figure S4.** Photographs that illustrate the catalytic reduction process of 4-NP aqueous solution in the presence of Ni-Pd/Fe<sub>3</sub>O<sub>4</sub> catalyst (a) and the easy recyclability of Ni-Pd/Fe<sub>3</sub>O<sub>4</sub> catalyst by a magnet.

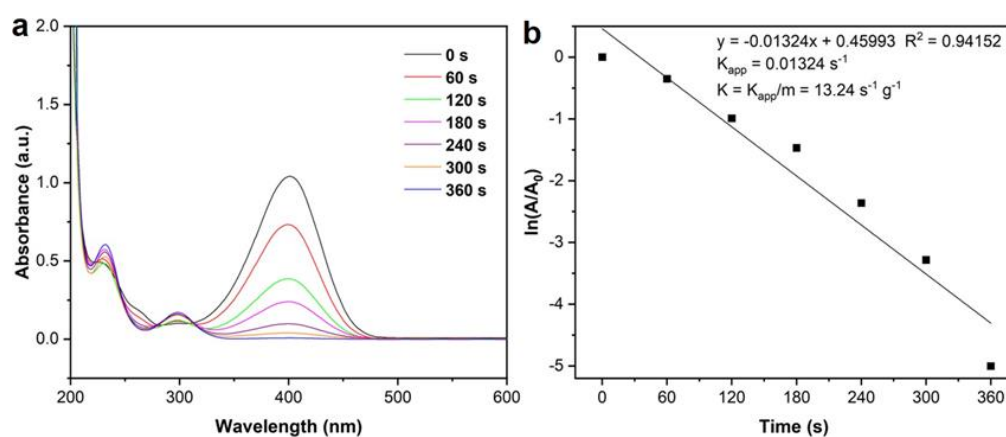

**Figure S5.** (a) Time-dependent UV-vis spectra for 4-NP reduction by NaBH<sub>4</sub> in the presence of Pd/Fe<sub>3</sub>O<sub>4</sub> catalyst and (b) the corresponding rate constant versus time.

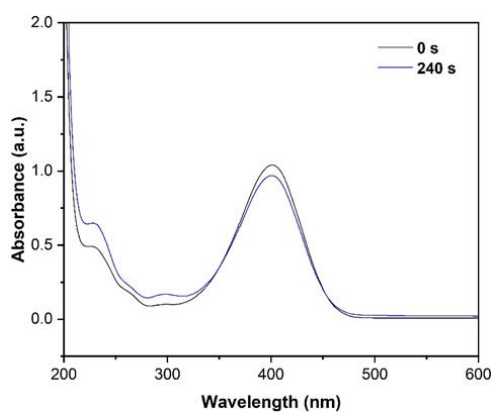

**Figure S6.** UV-vis spectra for 4-NP reduction by NaBH<sub>4</sub> in the presence of Ni/Fe<sub>3</sub>O<sub>4</sub> for 4 min.

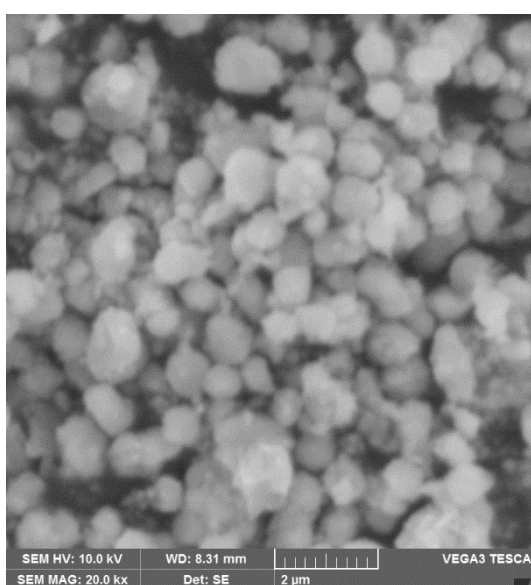

**Figure S7** SEM image of the recycled Fe<sub>3</sub>O<sub>4</sub> yolk-shelled nanospheres.

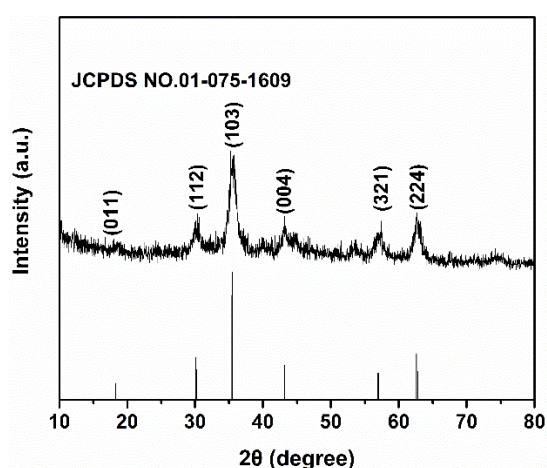

**Figure S8** XRD pattern of recycled Ni-Pd/Fe<sub>3</sub>O<sub>4</sub> and standard card JCPDS No. 01-075-1609.

**Table S1** Comparison of the turnover frequency (TOF) in the 4-NP reduction catalyzed by the Fe<sub>3</sub>O<sub>4</sub> supported catalysts in this work and the reported literature.

| $\text{HO}-\text{C}_6\text{H}_4-\text{NO}_2 \xrightarrow[\text{Catalyst}]{\text{NaBH}_4} \text{HO}-\text{C}_6\text{H}_4-\text{NH}_2$ |                       |                       |                      |                                  |           |
|--------------------------------------------------------------------------------------------------------------------------------------|-----------------------|-----------------------|----------------------|----------------------------------|-----------|
| Catalyst                                                                                                                             | Mass of catalyst (mg) | Amount of 4-NP (mmol) | Conversion time(min) | TOF (mmol 4-NP/(mmol metal min)) | Ref.      |
| Pd-Ni/Fe <sub>3</sub> O <sub>4</sub>                                                                                                 | 1                     | 1×10 <sup>-1</sup>    | 4                    | 295 <sup>a</sup>                 | This work |
| Pd/Fe <sub>3</sub> O <sub>4</sub>                                                                                                    | 1                     | 1×10 <sup>-1</sup>    | 6                    | 204                              | This work |
| Ni/Fe <sub>3</sub> O <sub>4</sub>                                                                                                    | 1                     | 1×10 <sup>-1</sup>    | -                    | -                                | This work |
| Pd-Fe <sub>3</sub> O <sub>4</sub>                                                                                                    | 3                     | 6×10 <sup>-2</sup>    | 1.83                 | 145                              | [35]      |
| Fe <sub>3</sub> O <sub>4</sub> @PDA/Au/PDA                                                                                           | 3                     | 5×10 <sup>-3</sup>    | 5                    | 0.7                              | [48]      |
| Fe <sub>3</sub> O <sub>4</sub> @CS_AgNi                                                                                              | 0.4                   | 0.25×10 <sup>-3</sup> | 10                   | 0.008                            | [49]      |
| Fe <sub>3</sub> O <sub>4</sub> /SiO <sub>2</sub> @PDA/Pd                                                                             | 2                     | 3×10 <sup>-3</sup>    | 2                    | 4.3                              | [50]      |
| Fe <sub>3</sub> O <sub>4</sub> @MIL-100(Fe)/Ag                                                                                       | 0.1                   | 3×10 <sup>-4</sup>    | 1                    | 45                               | [51]      |
| Fe <sub>3</sub> O <sub>4</sub> @C@Au                                                                                                 | 1                     | 1×10 <sup>-4</sup>    | 0.67                 | 0.13                             | [52]      |
| Cu/MC                                                                                                                                | 0.5                   | 1.8×10 <sup>-3</sup>  | 5                    | 0.91                             | [53]      |
| Ag/C/Fe <sub>3</sub> O <sub>4</sub>                                                                                                  | 6                     | 7.5×10 <sup>-2</sup>  | 7                    | 2.3                              | [54]      |

---

|                                                                          |                    |                      |      |       |      |
|--------------------------------------------------------------------------|--------------------|----------------------|------|-------|------|
| Fe <sub>3</sub> O <sub>4</sub> @Alg-AuNPs                                | 1                  | 7.5×10 <sup>-3</sup> | 4    | 10.26 | [55] |
| Fe <sub>3</sub> O <sub>4</sub> @COF-Au                                   | 3                  | 9×10 <sup>-3</sup>   | 20   | 5.8   | [56] |
| Ag@Fe <sub>3</sub> O <sub>4</sub>                                        | 0.1                | 3×10 <sup>-4</sup>   | 8    | 0.04  | [57] |
| Fe <sub>3</sub> O <sub>4</sub> /SiO <sub>2</sub> -NH <sub>2</sub> @CS/Pd | 23                 | 7.5×10 <sup>-3</sup> | 2    | 0.54  | [58] |
| Au/Fe <sub>3</sub> O <sub>4</sub>                                        | 1                  | 5×10 <sup>-4</sup>   | 0.33 | 13.8  | [59] |
| 10Ag-FA                                                                  | 20                 | 5×10 <sup>-3</sup>   | 5    | 0.09  | [60] |
| Co-Fe <sub>3</sub> O <sub>4</sub> @C-A                                   | 0.1                | 3×10 <sup>-4</sup>   | 1.33 | 3.43  | [61] |
| Cu-APTES@Fe <sub>3</sub> O <sub>4</sub>                                  | 3×10 <sup>-2</sup> | 5×10 <sup>-4</sup>   | 10   | 4.18  | [62] |
| CNT/PdFe/NC                                                              | 3                  | 6×10 <sup>-2</sup>   | 2.5  | 16.7  | [63] |
| PDA-g-C <sub>3</sub> N <sub>4</sub> /Au                                  | 5                  | 3×10 <sup>-3</sup>   | 1.3  | 7.0   | [64] |
| Pd/GNS-NH <sub>2</sub>                                                   | 5                  | 2×10 <sup>-2</sup>   | 1    | 41.7  | [65] |
| Pd/Pr <sub>6</sub> O <sub>11</sub>                                       | 0.14               | 1×10 <sup>-3</sup>   | 3    | 17.8  | [66] |

---

<sup>a</sup> Calculated based on active metal Pd.
